# Supplementary material for: Ultrafine Co1−xS nanoparticles embedded in a nitrogen-doped porous carbon hollow nanosphere composite as an anode for superb sodium-ion batteries and lithium-ion batteries
Source: Royal Society of Chemistry journal article supplement (doi:10.1039/c7nr07882j), 2018-01-01
Supplement: c7nr07882j1.pdf [file c7nr07882j1.pdf]

# **Ultrafine $\text{Co}_{1-x}\text{S}$ Nanoparticles Embedded in Nitrogen Doped Porous Carbon Hollow Nanosphere Composite as Anode for Superb Sodium-Ion Batteries and Lithium Ion Batteries**

Caifu Dong<sup>a</sup>, Lijun Guo<sup>a</sup>, Yanyan He<sup>a</sup>, Limei Shang<sup>a</sup>, Yitai Qian<sup>\*,a</sup> and Liqiang Xu<sup>\*,b</sup>

<sup>a</sup> Key Laboratory of the Colloid and Interface Chemistry, Ministry of Education, and School of Chemistry and Chemical Engineering, Shandong University, Jinan, 250100, P.R. China

<sup>b</sup>State Key Laboratory of Coordination Chemistry, Nanjing University, P.R. China

## Content

### Figure captions:

**Fig. S1.** Typical SEM (a) and TEM (b) images of the obtained material without of 2-methylimidazole addition.

**Fig. S2.** EDS spectra of  $\text{Co}_{1-x}\text{S}$  (a),  $\text{Co}_{1-x}\text{S}@C$  (b) and  $\text{Co}_{1-x}\text{S}/C$  (c).

**Fig. S3.** TGA curves for the  $\text{Co}_{1-x}\text{S}$ ,  $\text{Co}_{1-x}\text{S}@C$  and  $\text{Co}_{1-x}\text{S}/C$  between room temperature and 650 °C measured with a heating rate of 5 °C /min under air atmosphere.

**Fig. S4.** Typical TEM images of the obtained materials using different amounts (mg) of 2-methylimidazole addition (a) 0, (b) 16.4, (c) 39.4, (d) 65.6, (e) 124.8, (f) 147.8 mg.

**Fig. S5.** The effect of different reaction time on the morphology of the materials (a) 12 h, (b) 6 h, (c) 30 min. Effect of different reaction temperature on morphology, (d) 50 °C (e) 70 °C.

**Fig. S6.** (a) FT-IR spectra of the materials obtained by adding different amounts (mg) of 2-methylimidazole, ( I ) 2-methylimidazole, ( II ) thiosemicarbazide, ( III ) 0, ( IV ) 39.4, ( V ) 124.8. (b) XRD patterns of the as-prepared samples when the amount of 2-methylimidazole was 0 mg ( I ), 39.4 mg, ( II ) and 124.8 mg ( III ) after reaction 72 h.

**Fig. S7.** EDS spectra of adding different amounts (mg) of 2-methylimidazole, (a) 39.4 (b) 65.6 (c) 124.8.

**Fig. S8.** The effect of different sulfur sources on the morphology of the material when the amount of 2-methylimidazole was added 124.8 mg (a) thiourea, (b) thioacetamide. The effect of metal salt anions on the morphology of the material when the amount of 2-methylimidazole was 124.8 mg, (c)  $\text{CoSO}_4 \cdot 7\text{H}_2\text{O}$ , (d)  $\text{Co}(\text{CH}_3\text{COO})_2 \cdot 4\text{H}_2\text{O}$ , (e)  $\text{CoCl}_2 \cdot 6\text{H}_2\text{O}$ .

**Fig. S9.** The effect of different sulfur sources on the morphologies of the solid spheres morphology (a) thiourea, (b) thioacetamide.

**Tab. S1.** The overview diagram of the precursors under different conditions (means using different S resource, Cobalt source, temperature, and time different amounts of 2-methylimidazole (mg)).

**Fig. S10.** Effect of Ni-doping on material morphology, (a)  $\text{Co}^{2+} : \text{Ni}^{2+} = 15 : 1$ , (b)  $\text{Co}^{2+} : \text{Ni}^{2+} = 10 : 1$ , (c)  $\text{Co}^{2+} : \text{Ni}^{2+} = 5 : 1$ .

**Fig. S11.** EDS spectra of Ni-doped precursor.

**Fig. S12.** TEM and SEM images of Ni-doped  $\text{Co}_{1-x}\text{S}$  precursor@PPy.

**Fig. S13.** (a) Electrolyte optimization of  $\text{Co}_{1-x}\text{S}$ -Na batteries. TEM images of  $\text{Co}_{1-x}\text{S}$  (b),  $\text{Co}_{1-x}\text{S}/\text{C}$  (c) and  $\text{Co}_{1-x}\text{S}@/\text{C}$  (d) obtained after 30 cycles at current density of  $500 \text{ mA g}^{-1}$ .

**Fig. S14.** Electrochemical performance of  $\text{Co}_{1-x}\text{S}$ ,  $\text{Co}_{1-x}\text{S}/\text{C}$  and  $\text{Co}_{1-x}\text{S}@/\text{C}$  electrodes at  $100 \text{ mA g}^{-1}$ .

**Fig. S15.** TEM images of  $\text{Co}_{1-x}\text{S}@/\text{C}$  and  $\text{Co}_{1-x}\text{S}/\text{C}$  obtained after 120 cycles at current density of  $500 \text{ mA g}^{-1}$ .

**Fig. S16.** Cyclic voltammetry (CV) curves of  $\text{Co}_{1-x}\text{S}$  (a) and  $\text{Co}_{1-x}\text{S}@/\text{C}$  (b).

**Tab. S2.** Electrochemical performance comparisons of the  $\text{Co}_{1-x}\text{S}/\text{C}$  electrode with some typical transition metal chalcogenides anode materials for SIBs.

**Fig. S17.** (a) Charge capacities of Ni-doped  $\text{Co}_{1-x}\text{S}/\text{C}$  electrode at  $500 \text{ mA g}^{-1}$ . (b) Rate capabilities of the Ni-doped  $\text{Co}_{1-x}\text{S}/\text{C}$  electrode (charge capacity).

**Fig. S18.** The electrochemical performance of  $\text{Co}_{1-x}\text{S}/\text{C}$  (a) and Ni-doped  $\text{Co}_{1-x}\text{S}/\text{C}$  (b) in commonly used carbonate-based electrolyte ( $1.0 \text{ M NaClO}_4\text{-EC/PC}$ ) at the current density of  $1000 \text{ mAh g}^{-1}$ .

**Tab. S3.** Electrochemical performance comparisons of the  $\text{Co}_{1-x}\text{S}/\text{C}$  electrode with some typical transition metal chalcogenides as anode materials for LIBs.

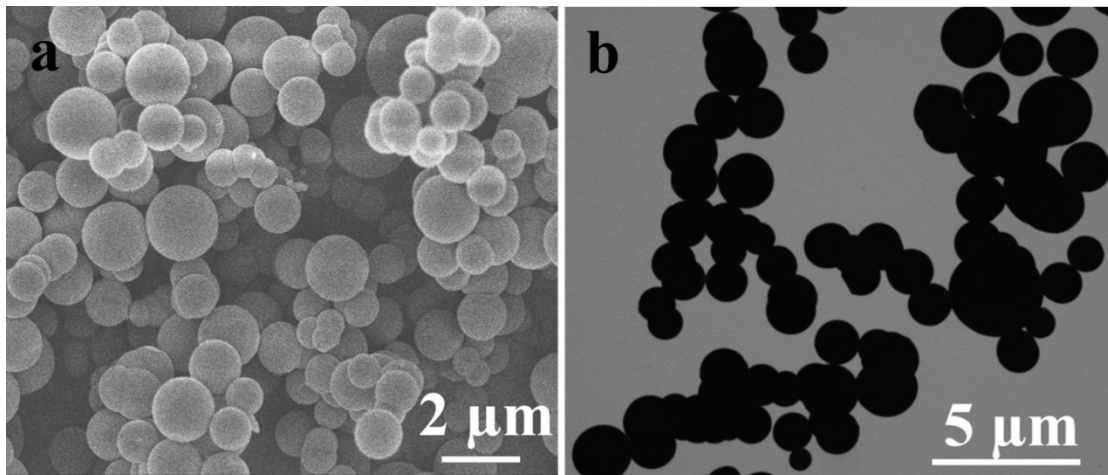

**Fig. S1** Typical SEM (a) and TEM (b) images of the obtained material without of 2-methylimidazole addition.

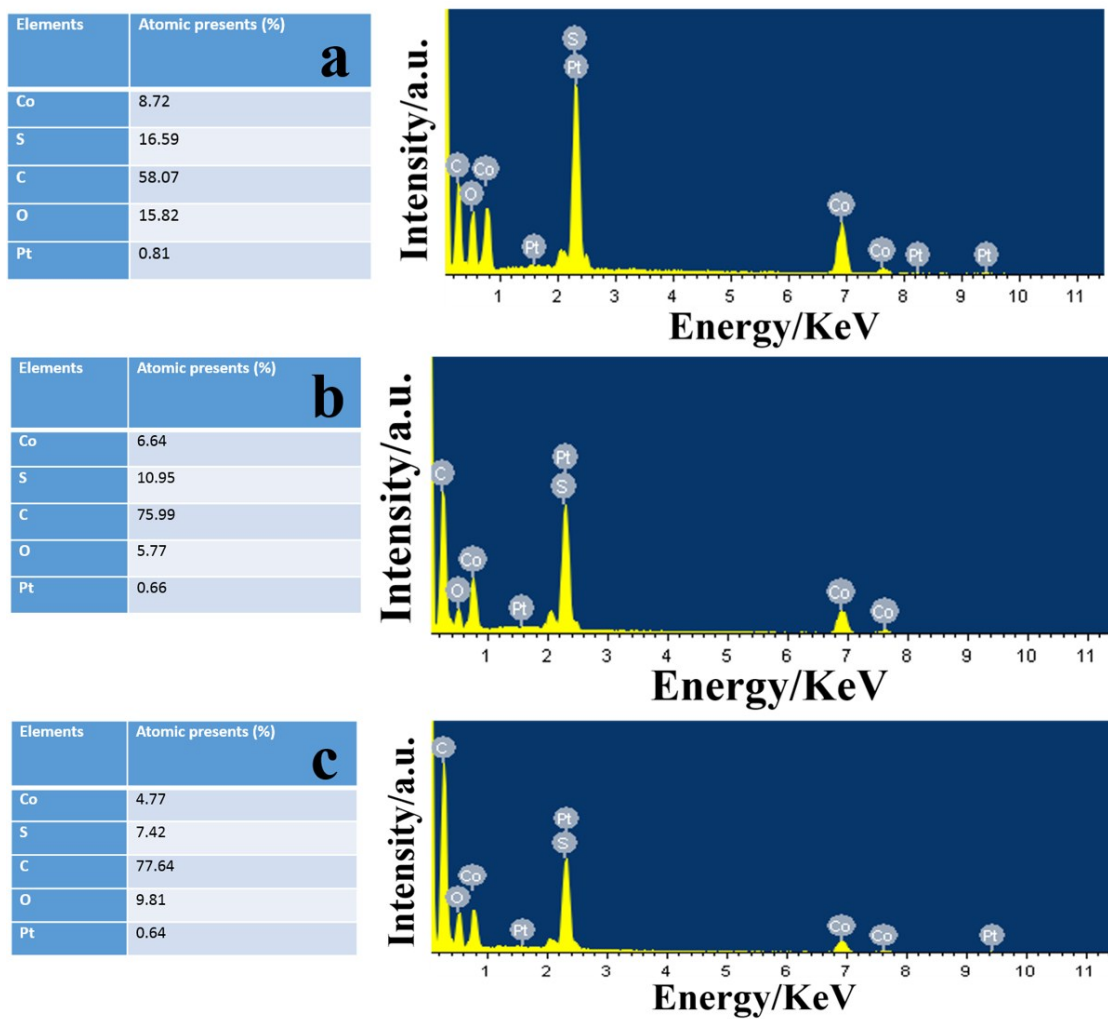

Fig. S2 EDS spectra of  $\text{Co}_{1-x}\text{S}$  (a),  $\text{Co}_{1-x}\text{S}@C$  (b) and  $\text{Co}_{1-x}\text{S}/C$  (c).

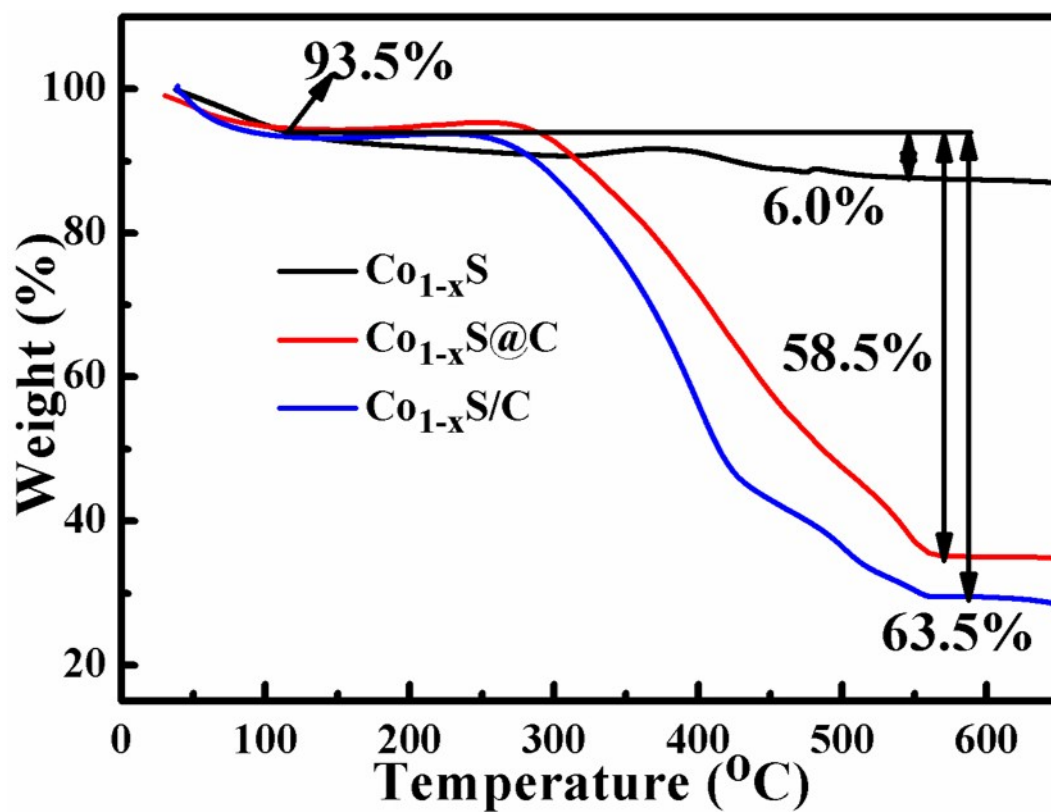

Fig. S3 TGA curves for the  $\text{Co}_{1-x}\text{S}$ ,  $\text{Co}_{1-x}\text{S}@C$  and  $\text{Co}_{1-x}\text{S}/C$  between room temperature and 650 °C measured with a heating rate of 5 °C /min under air atmosphere.

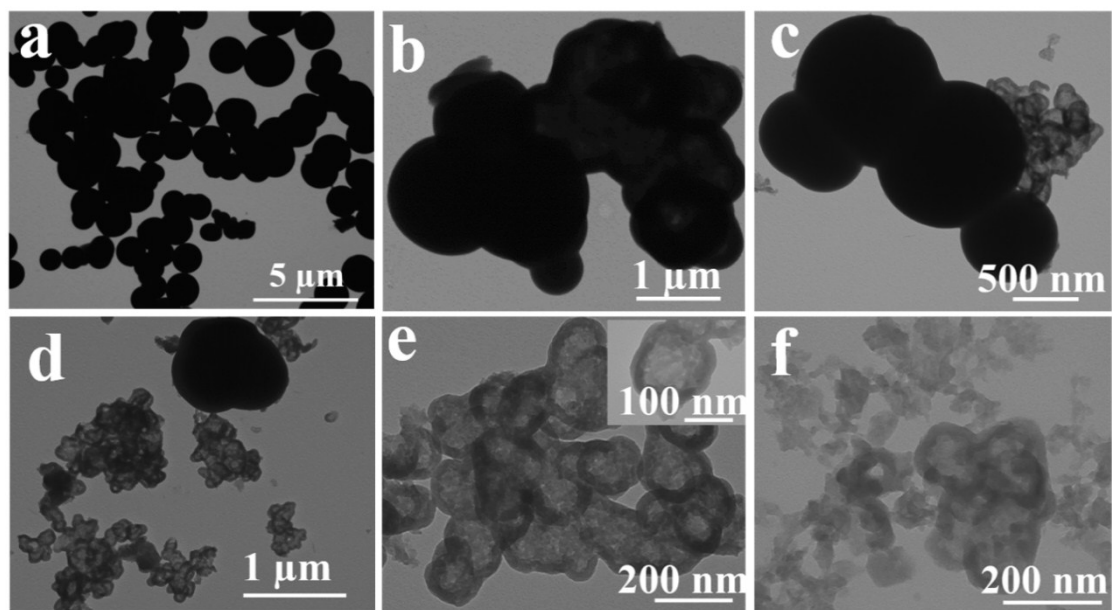

**Fig. S4** Typical TEM images of the obtained materials using different amounts (mg) of 2-methylimidazole addition (a) 0, (b) 16.4, (c) 39.4, (d) 65.6, (e) 124.8, (f) 147.8 mg.



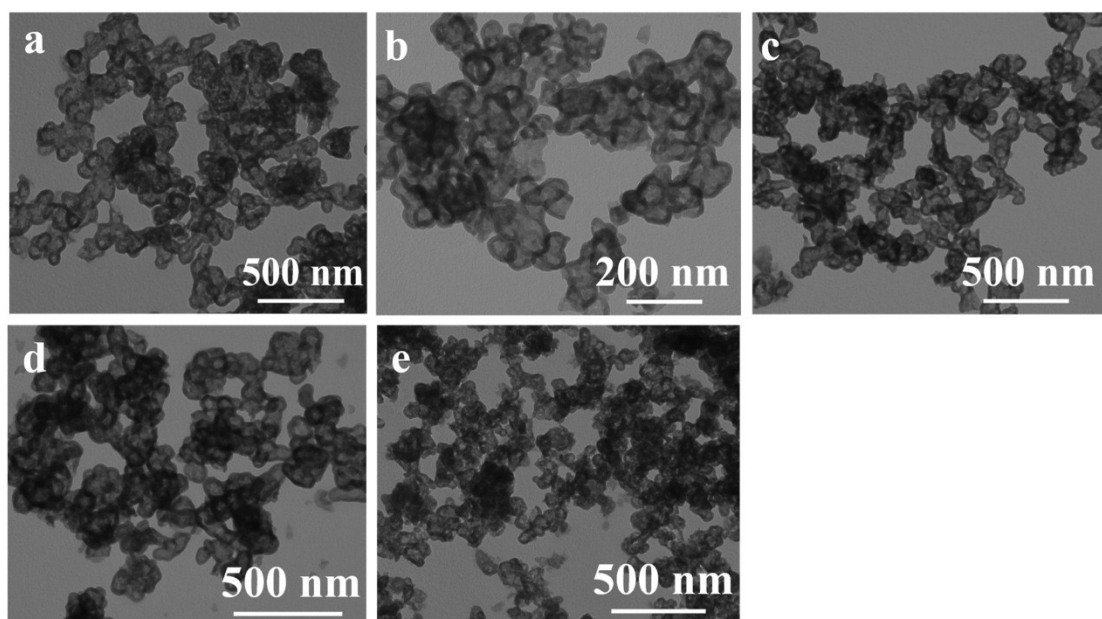

**Fig. S5** The effect of different reaction time on the morphology of the materials (a) 12 h, (b) 6 h, (c) 30 min. Effect of different reaction temperature on morphology, (d) 50 °C (e) 70 °C.

Time dependent experiments were carried out at 85 °C. Hollow spheres can obtain after reaction for 12 h, 6 h, even 30 min as shown in Fig. S3 a, b, c. The TEM images (Fig. S3 d, e,) exhibits also can obtain hollow spheres at 70 °C and 50 °C after reaction for 30 min. These results show the sphere morphology no obvious dependence on the reaction time and temperature.

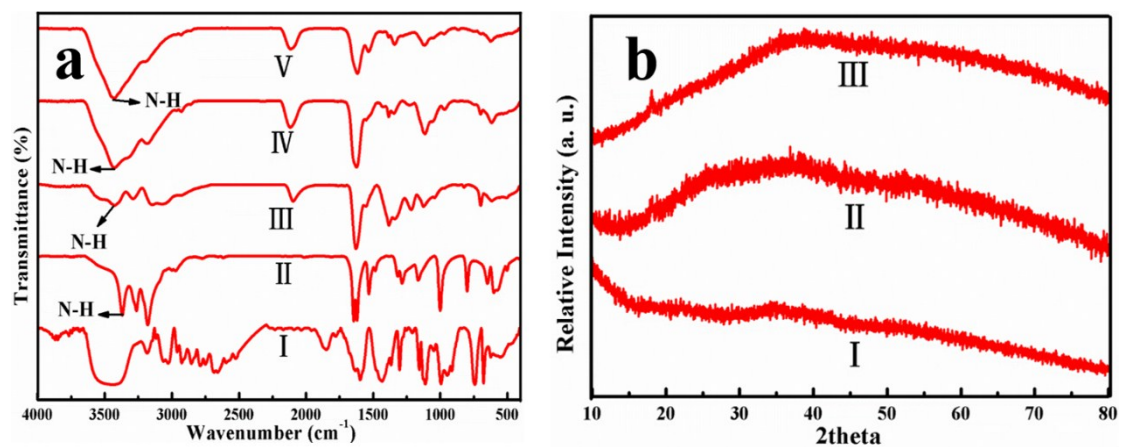

**Fig. S6** (a) FT-IR spectra of the materials obtained by adding different amounts (mg) of 2-methylimidazole, ( I ) 2-methylimidazole, ( II ) thiosemicarbazide, ( III ) 0, ( IV ) 39.4, ( V ) 124.8. (b) XRD patterns of the as-prepared samples when the amount of 2-methylimidazole was 0 mg ( I ), 39.4 mg, ( II ) and 124.8 mg ( III) after reaction 72 h.

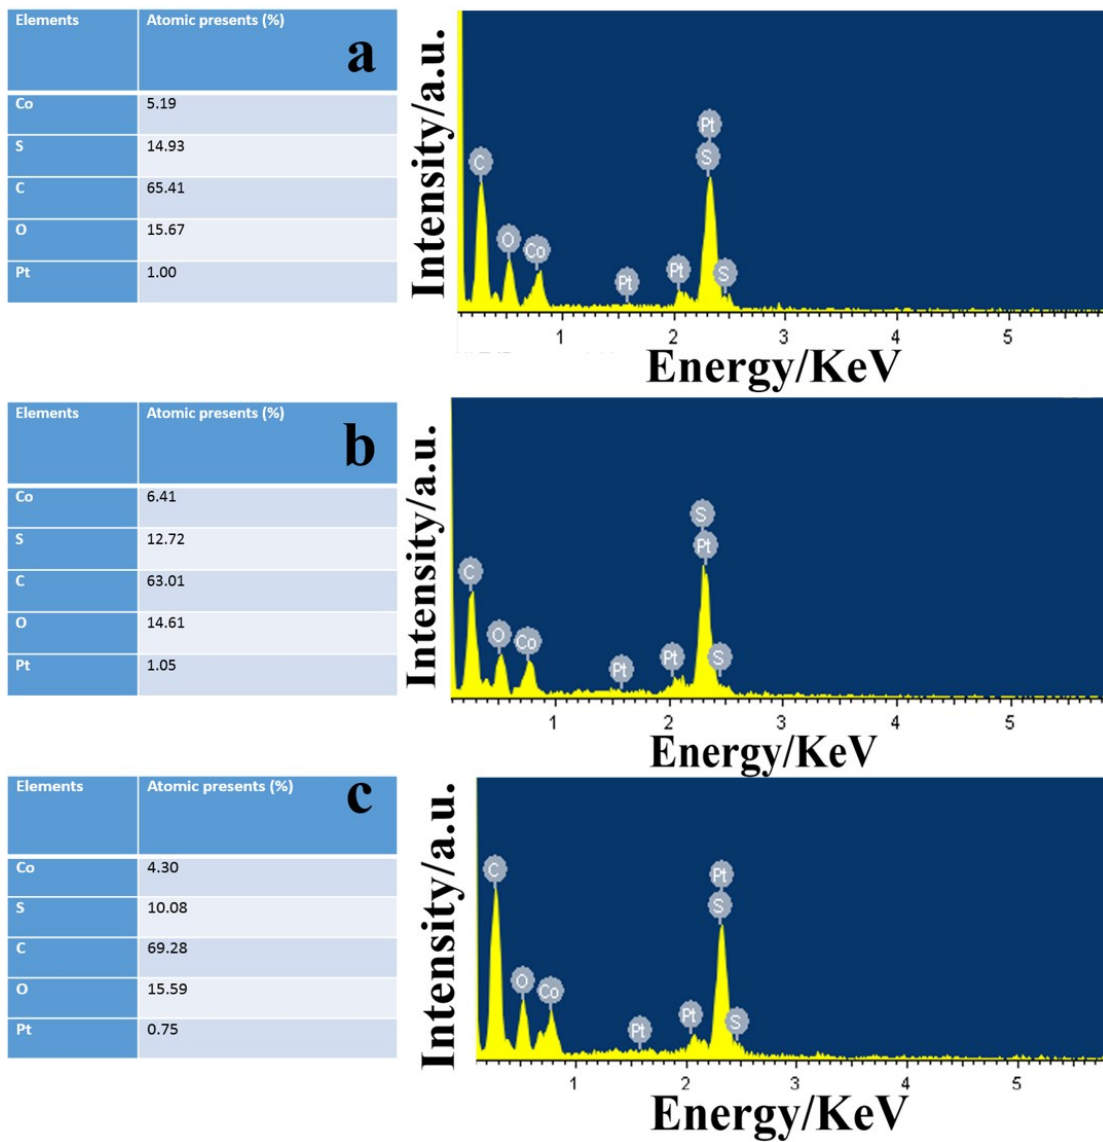

**Fig. S7** EDS spectra of adding different amounts (mg) of 2-methylimidazole, (a) 39.4 (b) 65.6 (c) 124.8.

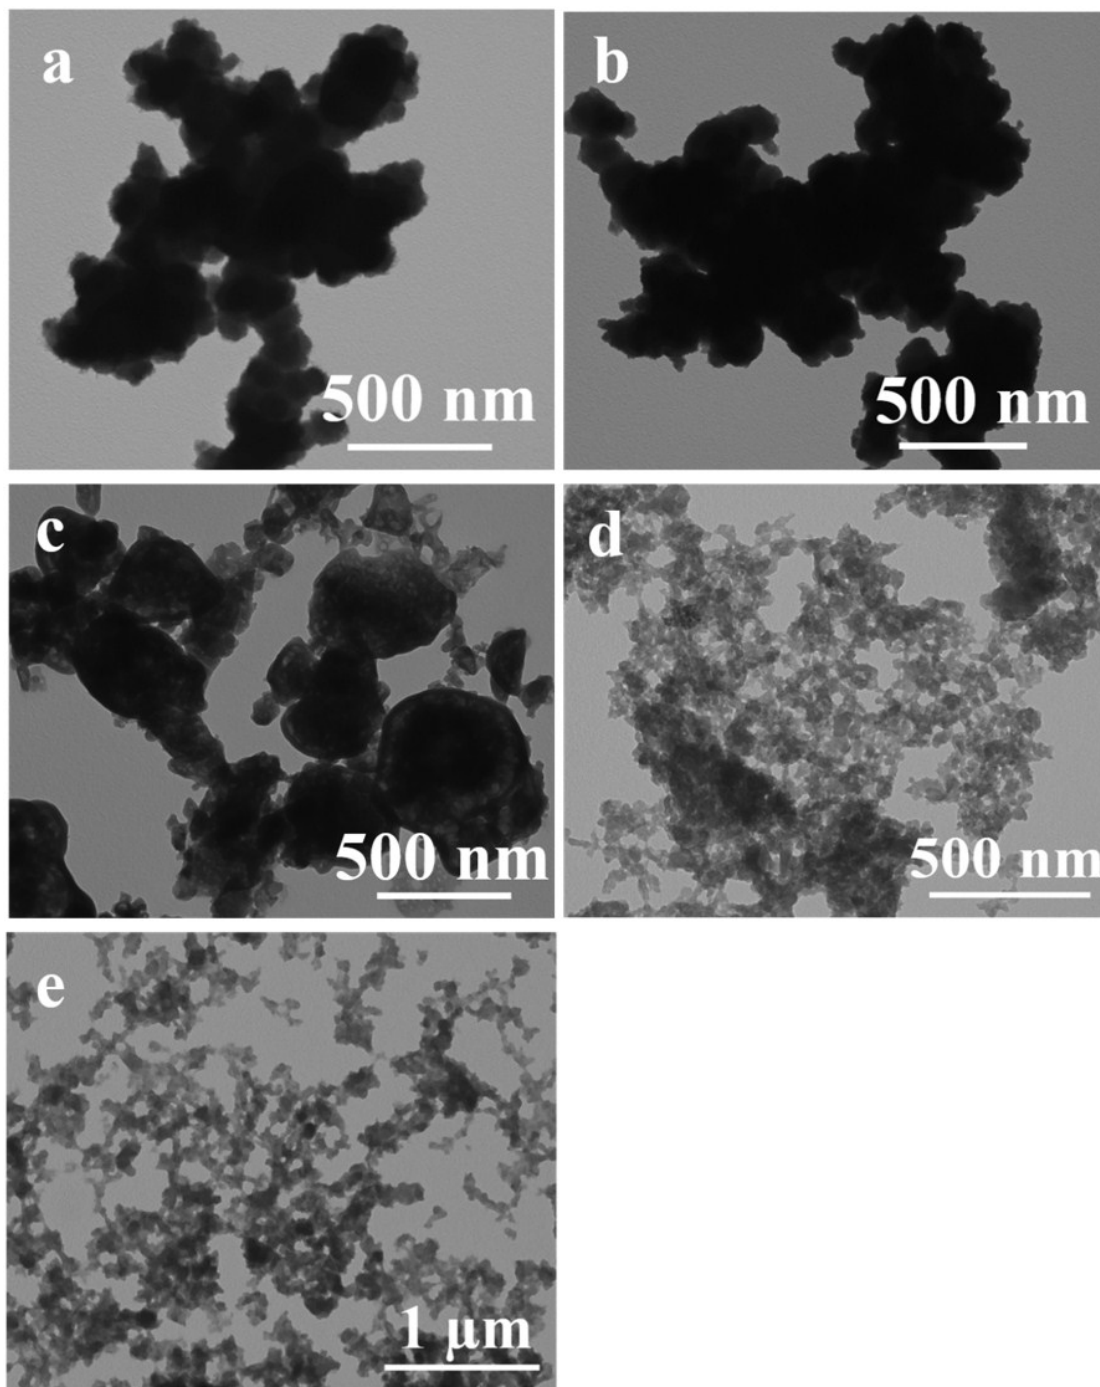

**Fig. S8** The effect of different sulfur sources on the morphology of the material when the amount of 2-methylimidazole was added 124.8 mg (a) thiourea, (b) thioacetamide. The effect of metal salt anions on the morphology of the material when the amount of 2-methylimidazole was 124.8 mg, (c)  $\text{CoSO}_4 \cdot 7\text{H}_2\text{O}$ , (d)  $\text{Co}(\text{CH}_3\text{COO})_2 \cdot 4\text{H}_2\text{O}$ , (e)  $\text{CoCl}_2 \cdot 6\text{H}_2\text{O}$ .

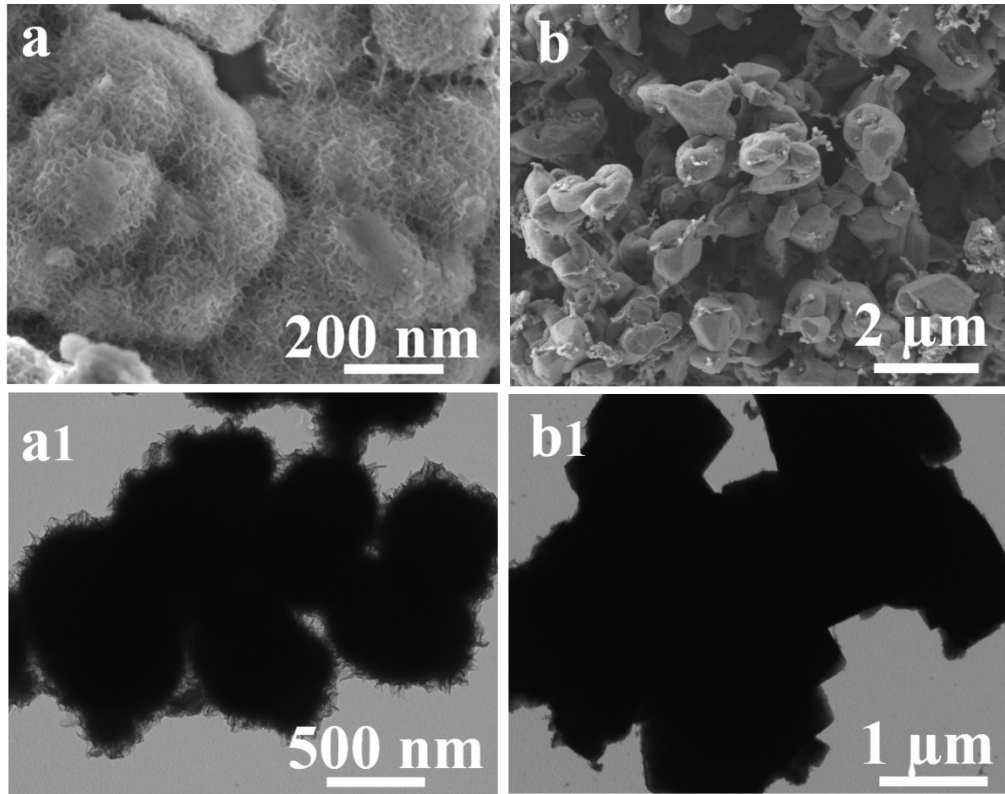

**Fig. S9** The effect of different sulfur sources on the morphologies of the solid spheres morphology (a) thiourea, (b) thioacetamide.

**Tab. S1** The overview diagram of the precursors under different conditions (means using different S resource, Cobalt source, temperature, and time different amounts of 2-methylimidazole (mg)).

| S resource | Cobalt source                                                  | 2-imidazole (mg) | Temperature (°C) | Time (h) | Morphologies                         | TEM images                                                                            |
|------------|----------------------------------------------------------------|------------------|------------------|----------|--------------------------------------|---------------------------------------------------------------------------------------|
| tsc        | $\text{Co}(\text{NO}_3)_2 \cdot 6\text{H}_2\text{O}$           | 0                | 85               | 72       | scattered solid spherical            | 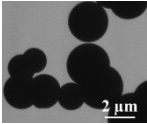   |
| tsc        | $\text{Co}(\text{NO}_3)_2 \cdot 6\text{H}_2\text{O}$           | 65.6             | 85               | 72       | hollow spherical and solid spherical |    |
| tsc        | $\text{Co}(\text{NO}_3)_2 \cdot 6\text{H}_2\text{O}$           | 124.8            | 85               | 72       | hollow spherical (highest yield)     |    |
| tsc        | $\text{Co}(\text{NO}_3)_2 \cdot 6\text{H}_2\text{O}$           | 124.8            | 85               | 6        | hollow spherical                     |    |
| tsc        | $\text{Co}(\text{NO}_3)_2 \cdot 6\text{H}_2\text{O}$           | 124.8            | 85               | 0.5      | hollow spherical                     |   |
| tsc        | $\text{Co}(\text{NO}_3)_2 \cdot 6\text{H}_2\text{O}$           | 124.8            | 70               | 0.5      | hollow spherical                     |  |
| tsc        | $\text{Co}(\text{NO}_3)_2 \cdot 6\text{H}_2\text{O}$           | 124.8            | 50               | 0.5      | hollow spherical                     |  |
| taa        | $\text{Co}(\text{NO}_3)_2 \cdot 6\text{H}_2\text{O}$           | 124.8            | 85               | 72       | Interconnected solid spheres         |  |
| thiourea   | $\text{Co}(\text{NO}_3)_2 \cdot 6\text{H}_2\text{O}$           | 124.8            | 85               | 72       | Interconnected solid spheres         |  |
| tsc        | $\text{CoCl}_2 \cdot 6\text{H}_2\text{O}$                      | 124.8            | 85               | 72       | Disordered nanosheets                |  |
| tsc        | $\text{CoSO}_4 \cdot 7\text{H}_2\text{O}$                      | 124.8            | 85               | 72       | Disordered porous nanosheets         |  |
| tsc        | $\text{Co}(\text{CH}_3\text{COO})_2 \cdot 4\text{H}_2\text{O}$ | 124.8            | 85               | 72       | Disordered nanosheets                |  |

Thioacetamide (taa), thiosemicarbazide (tsc).

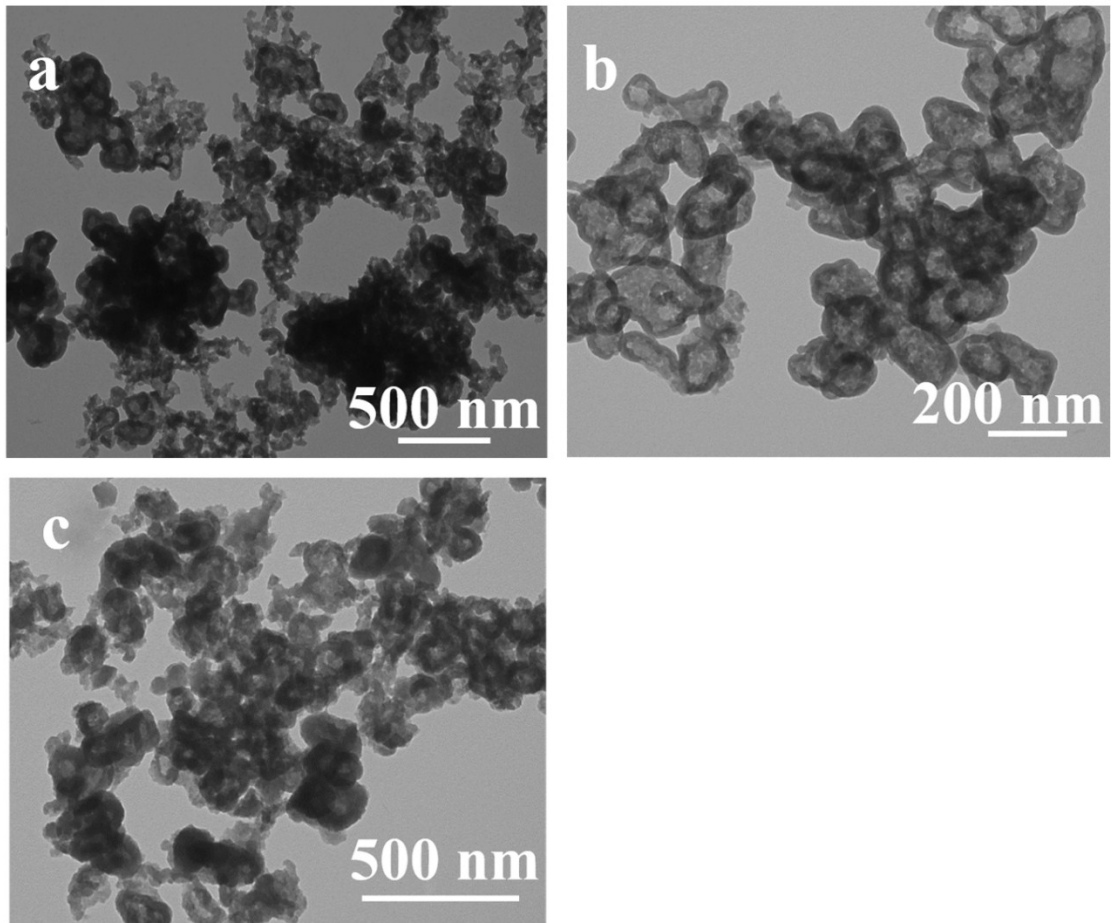

**Fig. S10** Effect of Ni-doping on material morphology, (a)  $\text{Co}^{2+}:\text{Ni}^{2+}=15:1$ , (b)  $\text{Co}^{2+}:\text{Ni}^{2+}=10:1$ , (c)  $\text{Co}^{2+}:\text{Ni}^{2+}=5:1$ .

1.

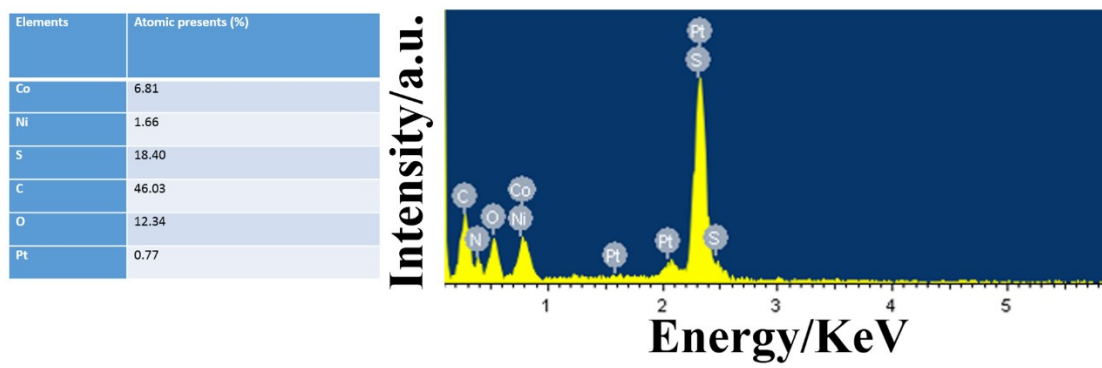

Fig. S11 EDS spectra of Ni-doped precursor.



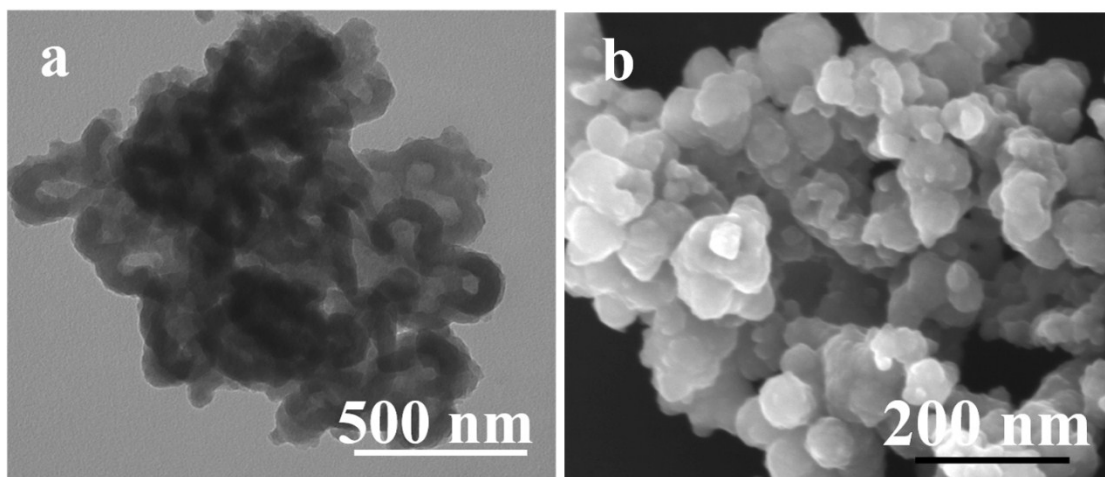

**Fig. S12** TEM and SEM images of Ni-doped  $\text{Co}_{1-x}\text{S}$  precursor@PPy.

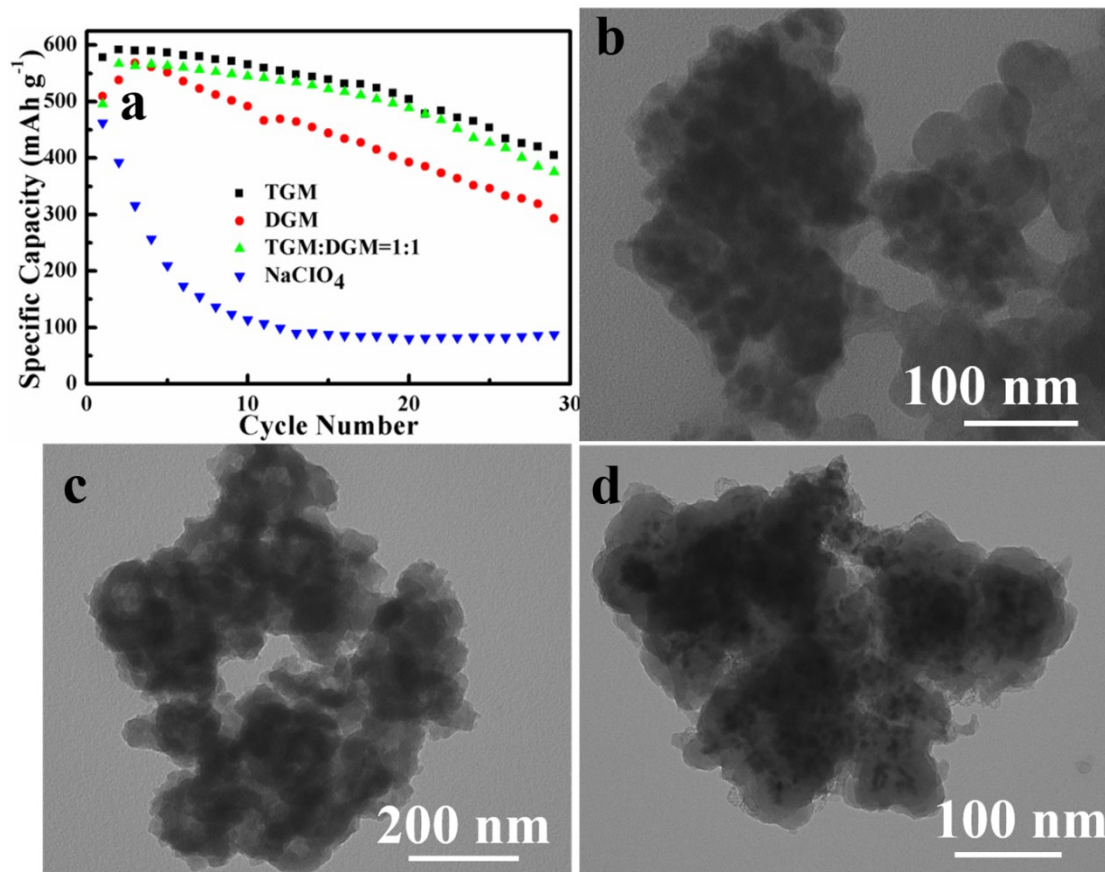

**Fig. S13** (a) Electrolyte optimization of  $\text{Co}_{1-x}\text{S}$ -Na batteries. TEM images of  $\text{Co}_{1-x}\text{S}$  (b),  $\text{Co}_{1-x}\text{S}/\text{C}$  (c) and  $\text{Co}_{1-x}\text{S}@/\text{C}$  (d) obtained after 30 cycles at current density of  $500 \text{ mA g}^{-1}$ .

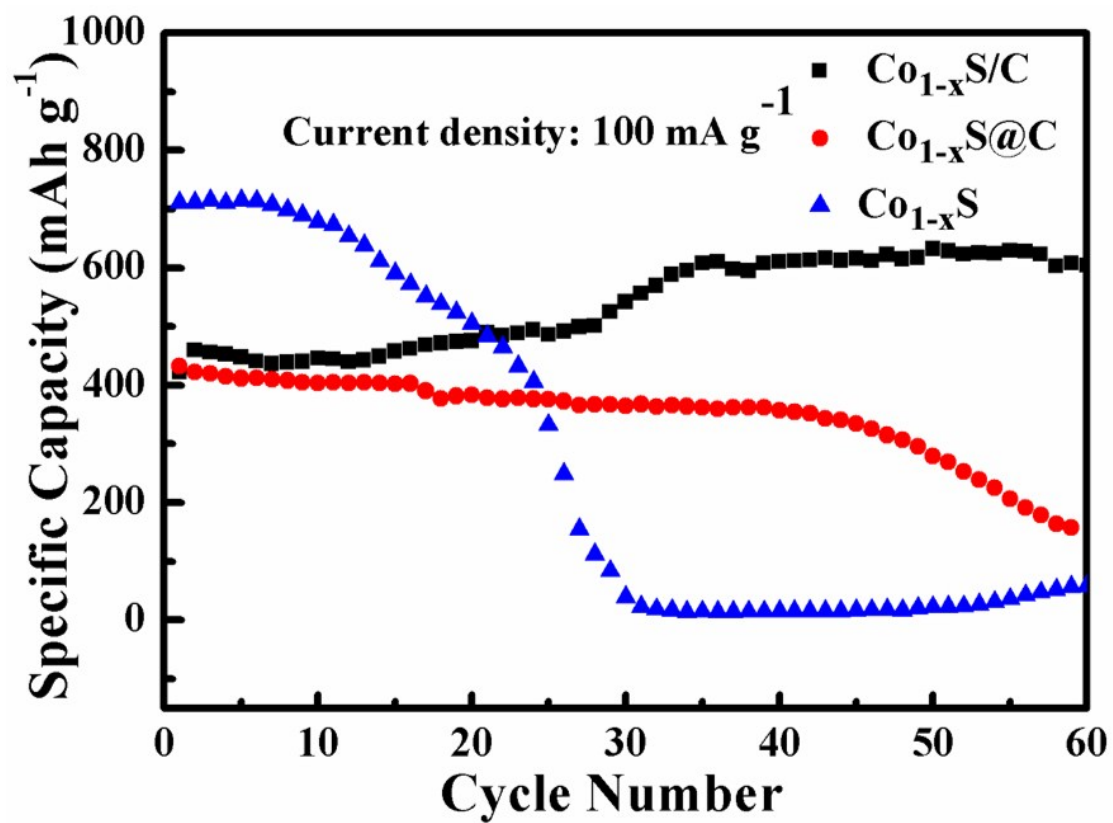

Fig. S14 Electrochemical performance of  $\text{Co}_{1-x}\text{S}$ ,  $\text{Co}_{1-x}\text{S/C}$  and  $\text{Co}_{1-x}\text{S@C}$  electrodes at  $100 \text{ mA g}^{-1}$ .

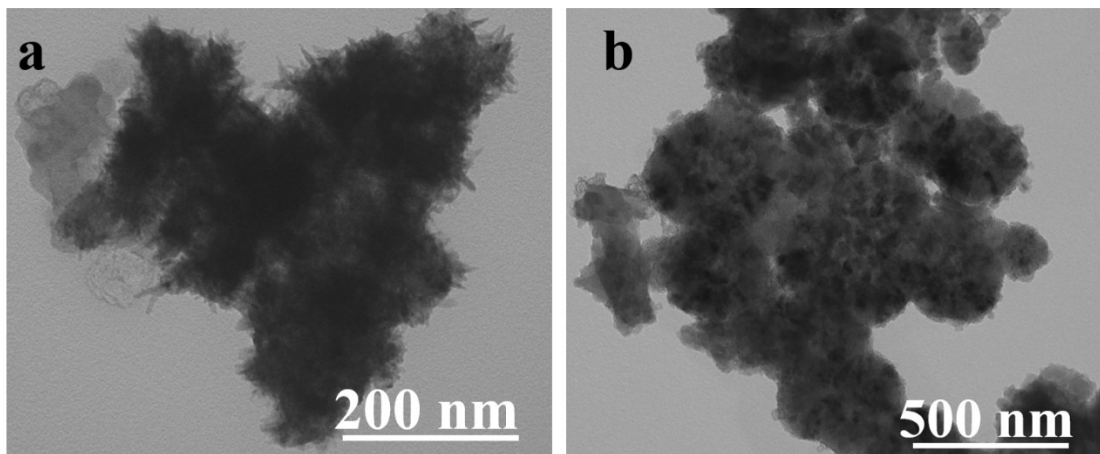

**Fig. S15** TEM images of Co<sub>1-x</sub>S@C and Co<sub>1-x</sub>S/C obtained after 120 cycles at current density of 500 mA g<sup>-1</sup>.

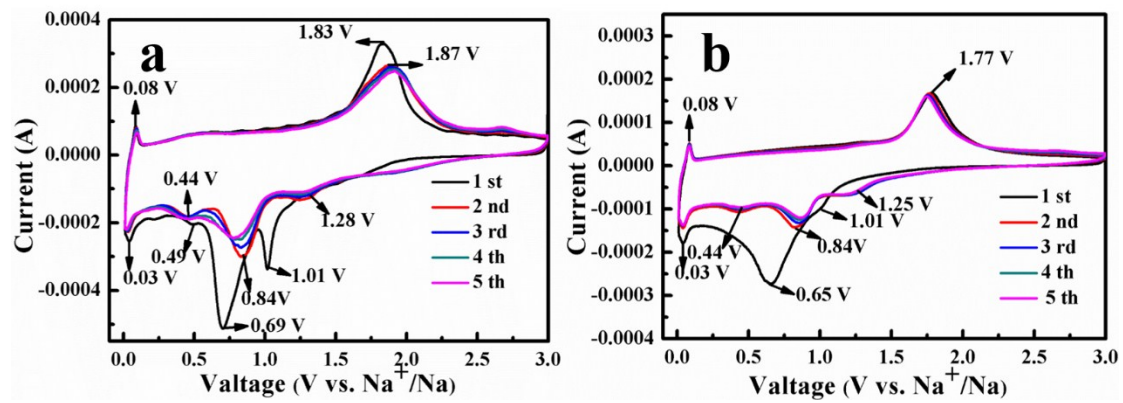

Fig. S16 Cyclic voltammetry (CV) curves of Co<sub>1-x</sub>S (a) and Co<sub>1-x</sub>S@C (b).

**Tab. S2** Electrochemical performance comparisons of the  $\text{Co}_{1-x}\text{S}/\text{C}$  electrode with some typical transition metal chalcogenides anode materials for SIBs.

| Electrode                             | Current ( $\text{mA g}^{-1}$ ) | Capacity ( $\text{mA h g}^{-1}$ ) | Cycle number | Ref/year |
|---------------------------------------|--------------------------------|-----------------------------------|--------------|----------|
| $\text{Co}_3\text{S}_4\text{-PNS/GS}$ | 500                            | 329                               | 50           | 1/2015   |
| $\text{Co}_9\text{S}_8\text{-carbon}$ | 500                            | 404                               | 50           | 2/2015   |
| $\text{CNT/CoS@C}$                    | 500                            | 398                               | 200          | 3/2017   |
| $\text{Co}_{1-x}\text{S/FGNs}$        | 1000                           | 251                               | 200          | 4/2015   |
| $\text{Co}_3\text{S}_4\text{@PANI}$   | 200                            | 252.5                             | 100          | 5/2016   |
| $\text{CoS}_2/\text{CoS/GC}$          | 200                            | 334                               | 100          | 6/2016   |
| $\text{CoS/C nanowires}$              | 100                            | 294                               | 100          | 7/2016   |
| $\text{CoS}_2/\text{CNTs}$            | 100                            | 568                               | 100          | 8/2015   |
| $\text{Co}_{1-x}\text{S/C}$           | 100                            | 601                               | 60           | our work |
|                                       | 500/1000                       | 470/326                           | 120/130      |          |

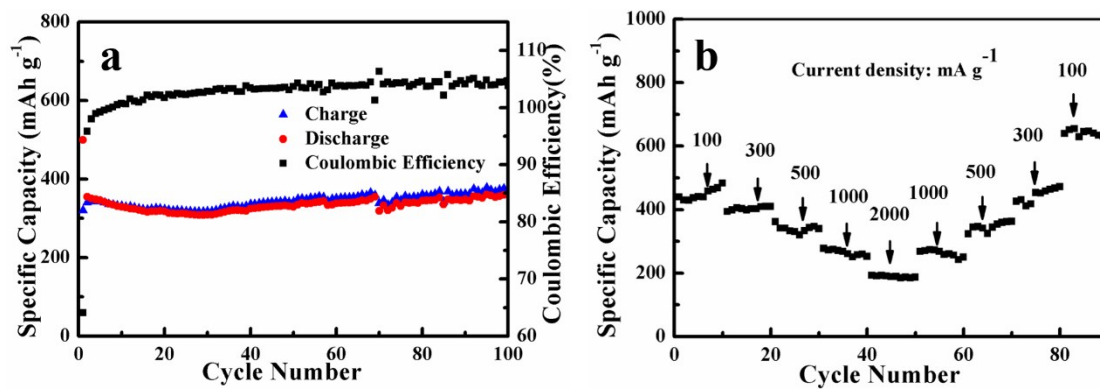

Fig. S17 (a) Charge capacities of Ni-doped  $\text{Co}_{1-x}\text{S}/\text{C}$  electrode at  $500 \text{ mA g}^{-1}$ . (b) Rate capabilities of the Ni-doped  $\text{Co}_{1-x}\text{S}/\text{C}$  electrode (charge capacity).

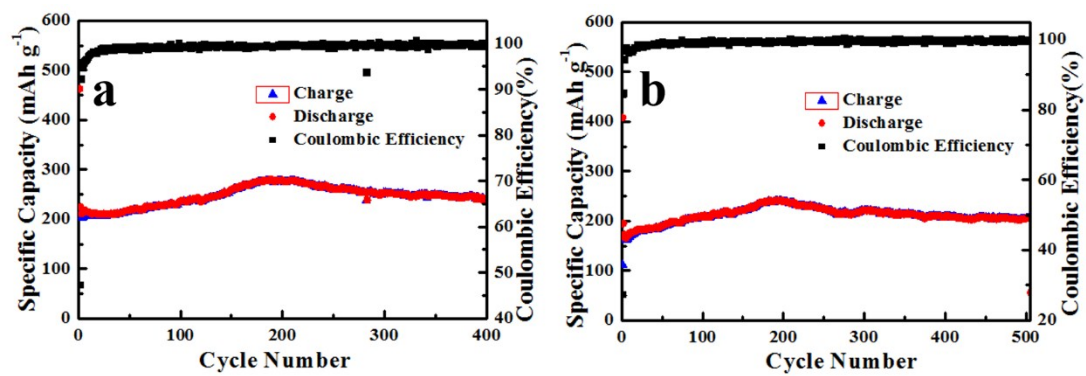

Fig. S18 The electrochemical performance of Co<sub>1-x</sub>S/C (a) and Ni-doped Co<sub>1-x</sub>S/C (b) in commonly used carbonate-based electrolyte (1.0 M NaClO<sub>4</sub>-EC/PC) at the current density of 1000 mAh g<sup>-1</sup>.



**Tab. S3** Electrochemical performance comparisons of the  $\text{Co}_{1-x}\text{S}/\text{C}$  electrode with some typical transition metal chalcogenides anode materials for LIBs.

| Electrode                          | Current ( $\text{mA g}^{-1}$ ) | Capacity ( $\text{mA h g}^{-1}$ ) | Cycle number | Ref/year |
|------------------------------------|--------------------------------|-----------------------------------|--------------|----------|
| C- $\text{Co}_9\text{S}_8$         | 545                            | 370                               | 300          | 9/2017   |
| $\text{Co}_{1-x}\text{S}$          | 100                            | 485                               | 150          | 10/2014  |
| $\text{CoS}_2/\text{rGO}$          | 50                             | 644                               | 30           | 11/2014  |
| $\text{CoS}_2/\text{G}$            | 400                            | 400                               | 90           | 12/2013  |
| $\text{CoS}_2$                     | 50                             | 320                               | 40           | 13/2011  |
| Ni- $\text{Co}_9\text{S}_8$        | 100                            | 720                               | 100          | 14/2016  |
| $\text{Co}_{1-x}\text{S}/\text{C}$ | 100                            | 797                               | 100          | our work |
|                                    | 500                            | 559                               | 100          |          |

#### References

- (1) Y. C. Du, X. S. Zhu, X. S. Zhou, L. Y. Hu, Z. H. Dai and J. C. Bao, *J. Mater. Chem. A*. 2015, **3**, 6787–6791.
- (2) Y. N. Ko and Y. C. Kang, *Carbon*, 2015, **94**, 85–90.
- (3) F. Han, C. Y. J. Tan and Z. Q. Gao, *J. Power Sources*. 2017, **339**, 41–50.
- (4) T. T. Chen, Y. F. Ma, Q. B. Guo, M. Yang and H. Xia, *J. Mater. Chem. A*. 2017, **5**, 3179–3185.
- (5) Q. Zhou, L. Liu, Z. F. Huang, L. G. Yi, X. Y. Wang and G. Z. Cao, *J. Mater. Chem. A*. 2016, **4**, 5505–5516.
- (6) J. S. Cho, J. M. Won, J. K. Lee and Y. C. Kang, *Nano Energy*, 2016, **26**, 466–478.
- (7) C. Wu, Y. Jiang, P. Kopold, P. A. V. Aken, J. Maier and Y. Yu, *Adv. Mater.* 2016, **28**, 7276–7283.
- (8) Z. Shadike, M. H. Cao, F. Ding, L. Sang and Z. W. Fu, *Chem. Commun.* 2015, **51**, 10486–10489.
- (9) Y. H. Wang, B. H. Wu, X. Y. He, Y. Y. Zhang, H. Li, Y. Y. Peng, J. Wang and J. B. Zhao, *Electrochimica Acta*. 2017, **230**, 299–307.
- (10) S. M. Liu, J. X. Wang, J. W. Wang, F. F. Zhang, F. Liang and L. M. Wang, *CrystEngComm*. 2014, **16**, 814–

- (11) Q. M. Su, J. Xie, J. Zhang, Y. J. Zhong, G. H. Du and B. S. Xu, *ACS Appl. Mater. Interfaces*, 2014, **6**, 3016–3022.
- (12) J. Xie, S. Y. Liu, G. S. Cao, T. J. Zhu and X. B. Zhao, *Nano Energy*, 2013, **2**, 49–56.
- (13) Q. H. Wang, L. F. Jiao, Y. Han, H. M. Du, W. X. Peng, Q. N. Huan, D. W. Song, Y. C. Si, Y. J. Wang and H. T. Yuan, *J. Phys. Chem. C*, 2011, **115**, 8300–8304.
- (14) R. C. Jin, J. H. Zhou, G. H. Li and L. X. Yang, *Materials Letters*, 2016, **163**, 183–186.
